# Supplementary material for: Saksenaea dorisiaesp. nov., a New Opportunistic Pathogenic Fungus from Europe
Source: Hindawi journal article supplement (doi:10.1155/2019/6253829), 2019-09-22
Supplement: f1 [file 6253829.f1.pdf]

1 SUPPLEMENTAL INFORMATION

2

3 TABLE S1: Effect of low-temperature (5±0.2°C) on viability of *Saksenaea dorisiae* (BiMM-F232)

| Fungus       | 1 d | 2 d | 3 d | 4d  | 7 d | 14d | 21d | 28d | 42d | 50d |
|--------------|-----|-----|-----|-----|-----|-----|-----|-----|-----|-----|
| Spores*      | +++ | +++ | +++ | +++ | +++ | +++ | +++ | +++ | +++ | +++ |
| Pellets **   | +++ | +++ | +++ | +++ | +   | -   | -   |     |     |     |
| Mycellium*** | +++ | ++  | -   | -   |     |     |     |     |     |     |

4 Growth: +++ = maximum (very good); ++ = good; + = poor; - = none; \* spores ( $4.0 \times 10^5$  CFU/mL physiologic  
 5 solution) collected from CZA; 100 µL applied on plate (MEA, 37°C); \*\* micro-pellets of ca 50-200 µm in diam. ~  
 6  $2.0 \times 10^4$ /mL) after 10-12 d incubation submerge YES5%, 140 rpm, 25°C; 100 µL applied on plate (MEA, 37°C);  
 7 \*\*\*mycelium without sporulation; colony growing on MEA plate after 4 d incubation (37°C) exposed to low  
 8 temperature 5±0.5°C °C

9

10

11

12

13 TABLE S2: Effect of high-temperature (40 ±0.1°C) on viability of *Saksenaea dorisiae* (BiMM-F232)

| Fungus      | 40°C (24h) | 40°C (48h) |
|-------------|------------|------------|
| Spores*     | -          | -          |
| Pellets**   | -          | -          |
| Mycelium*** | +          | -          |

14 Growth: + = poor; - = none; \* spores ( $4.0 \times 10^5$  CFU/mL physiologic solution) collected from CZA (noticed in  
 15 material and method); 100 µL applied on plate (MEA, 37°C); \*\* micro-pellets of ca 50-200 µm in diam. ~  $2.0 \times$   
 16  $10^4$ /mL) after 10-12 d incubation submerge YES5%, 140 rpm, 25°C; 100 µL applied on plate (MEA, 37°C);  
 17 \*\*\*mycelium without sporulation; colony growing on MEA plate after 4 d incubation (37°C) exposed to high  
 18 temperature (40 ±0.5°C)

19

20

21

22

23

24

25

26

27

28

29

30

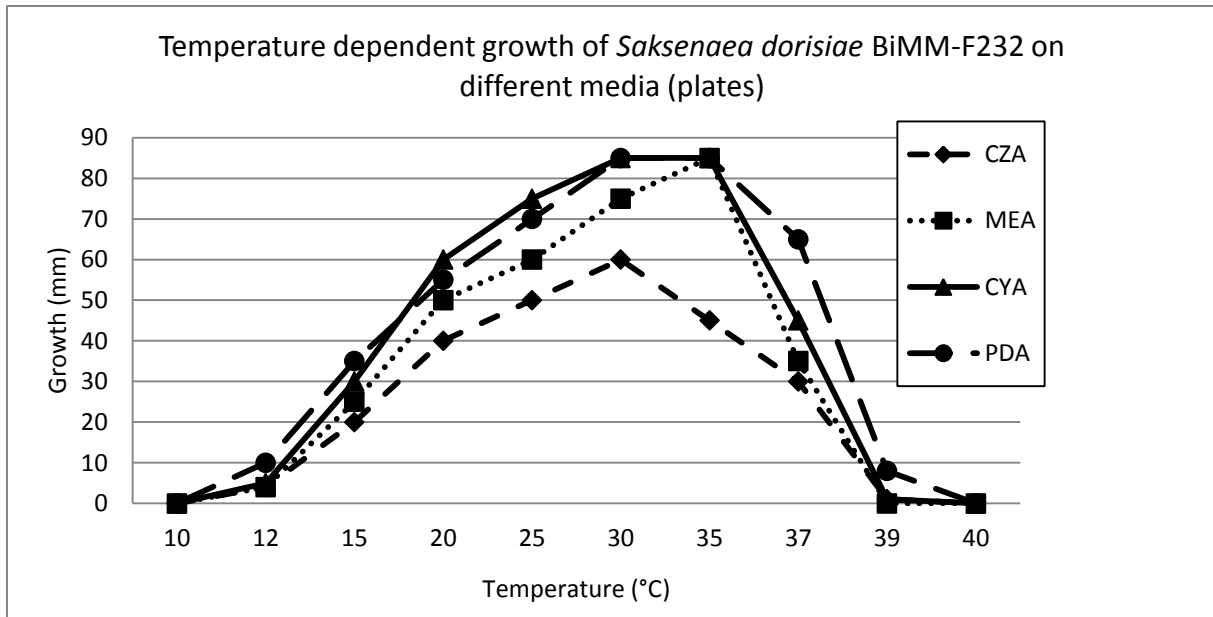

31

32 FIGURE S1: Temperature dependent growth of *Saksenaea dorisiae* (BiMM-F232) and its maximal colony  
 33 extension (in mm) on Czapek agar (CZA), Malt extract agar (MEA), Czapek- yeast extract agar (CYA) and Potato  
 34 dextrose agar (PDA)

35

36
